# Supplementary material for: High expression levels of centromere protein A plus upregulation of the phosphatidylinositol 3-kinase/Akt/mammalian target of rapamycin signaling pathway affect chemotherapy response and prognosis in patients with breast cancer
Source: PubMed Central journal article supplement — Oncol Lett. 2021 Mar 22;21(5):410. doi: 10.3892/ol.2021.12671 (PMC8020387; doi:10.3892/ol.2021.12671), 2021-03-22
Supplement: Supplementary_Data.pdf [file Supplementary_Data.pdf]

## Supplementary data

Genes in the green module.

---

|          |         |          |          |          |          |
|----------|---------|----------|----------|----------|----------|
| A2M      | ACTA2   | ACTG2    | ACTN1    | AEBP1    | AQP1     |
| RND3     | BGN     | SERPING1 | C1R      | C1S      | C3       |
| CALD1    | CAV1    | CAV2     | SERPINH1 | CDH5     | CDH11    |
| COL1A1   | COL1A2  | COL3A1   | COL4A1   | COL4A2   | COL5A1   |
| COL5A2   | COL6A2  | COL6A3   | COL8A2   | COL10A1  | COL11A1  |
| COL15A1  | COL16A1 | COMP     | CPA3     | VCAN     | CTGF     |
| CTSK     | CYP1B1  | DCN      | CYB5R3   | DPYSL2   | DPYSL3   |
| ECM2     | EDNRA   | EFNB2    | EMP1     | EPAS1    | EPB41L2  |
| FAP      | FAT1    | FBLN2    | FBN1     | EFEMP1   | FLNA     |
| FMO1     | FMO2    | FN1      | GAS1     | GAS6     | GEM      |
| GNG11    | GRP     | GUCY1A3  | GUCY1B3  | HBA2     | HBB      |
| CFH      | TNC     | ID1      | ID3      | CFI      | IGFBP3   |
| IGFBP7   | CYR61   | IL1R1    | INHBA    | ISLR     | ITGAV    |
| LAMB1    | LAMC1   | LOX      | LOXL1    | LTBP2    | LUM      |
| MAP1B    | MCAM    | MFAP2    | MMP2     | MMP3     | MMP11    |
| CD200    | MYLK    | NBL1     | NDN      | NID1     | NNMT     |
| OGN      | PAM     | PCOLCE   | PDGFRL   | PDGFRB   | SERPINF1 |
| SERPINE2 | PLAU    | PLS3     | PMP22    | PRRX1    | PODXL    |
| PROS1    | HTRA1   | RARRES2  | ROBO1    | ATXN1    | SDC1     |
| CXCL12   | SFRP4   | SNAI2    | SPARC    | SPOCK1   | ST5      |
| TAGLN    | TCF4    | TCF7L2   | ZEB1     | TGFB111  | TGFB3    |
| THBS2    | THBS4   | THY1     | KLF10    | TIMP1    | TIMP3    |
| TNFAIP6  | TPM2    | VWF      | PXDN     | MFAP5    | SSPN     |
| FZD7     | SPARCL1 | SRPX     | CILP     | PLPP1    | PLPP3    |
| LDB2     | NREP    | ITGBL1   | AKAP12   | KIAA0355 | RNF144A  |
| NUAK1    | GFPT2   | LPAR6    | LHFP     | LRRC17   | MYL9     |
| SPON2    | SPON1   | SEC23A   | FBLN5    | POSTN    | FERMT2   |
| ADAMTS5  | FSTL1   | FILIP1L  | FKBP9    | NID2     | CD93     |
| PALLD    | MYCBP2  | ZNF423   | SULF1    | HEY1     | SLC39A14 |
| BACE1    | LAMP5   | MXRA5    | OLFML2B  | WWTR1    | RAI14    |
| ZBTB20   | GREM1   | LMCD1    | EFEMP2   | DACT1    | EMCN     |
| RIN2     | MXRA8   | LEPROT   | ASPN     | SOBP     | PDGFC    |
| OLFML3   | PLSCR4  | ATP10D   | CEMIP    | HEG1     | JAM2     |
| ADGRL4   | PDLIM2  | TNS3     | BHLHE41  | TMEM204  | PDGFD    |
| COL18A1  | GLT8D2  | PLVAP    | CRISPLD2 | ARID5B   | TUBB6    |
| PLXDC2   | C1QTNF3 | LRRC15   | ZCCHC24  | ADGRF5   | PTRF     |
| EOGT     |         |          |          |          |          |

---
